# Supplementary material for: Dogs distinguish human intentional and unintentional action
Source: PubMed Central journal article supplement (PMC8410798; doi:10.1038/s41598-021-94374-3), 2021-09-01
Supplement: 41598_2021_94374_MOESM1_ESM.pdf [file 41598_2021_94374_MOESM1_ESM.pdf]

# **Dogs distinguish human intentional and unintentional action**

## **Supplementary Material**

Britta Schünemann<sup>1\*</sup>, Judith Keller<sup>1\*</sup>, Hannes Rakoczy<sup>1</sup>, Tanya Behne<sup>1</sup>, & Juliane Bräuer<sup>2,3</sup>

*<sup>1</sup>Department of Developmental Psychology, University of Göttingen, Waldweg 26, 37073 Göttingen, Germany*

*<sup>2</sup>Max Planck Institute for the Science of Human History, Department of Linguistic and Cultural Evolution, Kahlaische Strasse 10, 07745 Jena, Germany*

*<sup>3</sup>Department for General Psychology and Cognitive Neuroscience Friedrich Schiller University of Jena, Am Steiger 3, 07743 Jena, Germany*

\* Shared first authorship

Address for correspondence: Britta Schünemann, Georg-August-Universität Göttingen, Waldweg 26, 37073 Göttingen, Germany. Email: [britta.schuenemann@uni-goettingen.de](mailto:britta.schuenemann@uni-goettingen.de)

ORCID iD Britta Schünemann: 0000-0002-7493-5904

## Supplementary Materials

**Analysis of Waiting.** To analyse whether dogs waited longer in the unwilling than in the unable conditions, we fitted a Generalized Linear Mixed Model with beta error distribution and logit link function. We included Condition as a fixed effect in the model. Condition was dummy coded with unwilling being the reference level. To account for repeated measures, we included dogs' ID as random intercept effect. The dependent variable, waiting behaviour, was operationalized by the relative latency of going around the partition (latency of condition divided by sum of latencies in all three conditions). The model was stable (see Fig. S1) and not overdispersed (dispersion parameter=1.038). Based on a likelihood ratio test, we compared this full model to a null model including only dogs' ID as random intercept effect.

full model: Relative Latency  $\sim$  Condition+ (1| Dog's ID), family= beta, link=logit

null model: Relative Latency  $\sim$  (1| Dog's ID), family= beta, link=logit

The full-null model comparison revealed a main effect for Condition ( $\chi^2=43.909$ ,  $df=2$ ,  $p<.001$ , AIC (full model)= -183.681). See Table S1 for the detailed coefficients of the full model. Adding age to the full model did not increase the fit of the model ( $\chi^2=0.0139$ ,  $df=1$ ,  $p=0.906$ , AIC = -181.695). This was also the case for adding order of condition ( $\chi^2=0.201$ ,  $df=5$ ,  $p=.999$ , AIC=-173.882) or the interaction of order and condition ( $\chi^2=13.241$ ,  $df=15$ ,  $p=.584$ , AIC = -166.922).

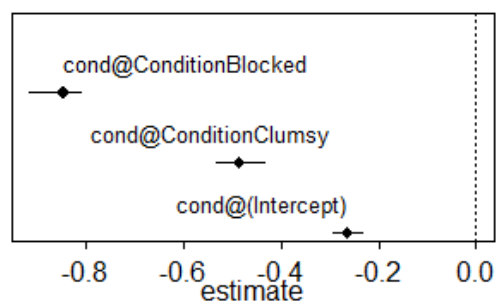

**Figure S1.** To determine model stability, one level of the random effect (Dog's ID) was dropped at a time. The figure shows the range of obtained estimates.

Table S1. Results of the full model with unwilling as reference level

| term                                  | $\beta$ | SE    | lower CI | upper CI <sup>2</sup> | z      | p     |
|---------------------------------------|---------|-------|----------|-----------------------|--------|-------|
| intercept                             | -0.264  | 0.080 | -0.428   | -0.107                | -3.293 | 0.001 |
| condition unable-clumsy <sup>1</sup>  | -0.486  | 0.116 | -0.718   | -0.241                | -4.176 | 0.000 |
| condition unable-blocked <sup>1</sup> | -0.847  | 0.121 | -1.083   | -0.606                | -7.022 | 0.000 |

<sup>1</sup>condition was dummy coded with unwilling being the reference level

<sup>2</sup>confidence were obtained via parametric bootstrap

Some dogs did not leave the basic feeding position at all. This was coded as the maximum latency of 27 seconds. To account for this, we also fitted a Cox mixed effects model on the raw measure of latency. This model accounts for individual baseline differences as well as time intervals where no  $t_1$  could be collected. As before, we included the condition as a fixed effect in our model and Dog's ID as random intercept in our full model. The dependent variable was latency accounting for trials without determined  $t_1$ . Again, this full model was compared to a null model including only the random intercept. A comparison of full and null model revealed a significant effect of condition ( $\chi^2=33.894$ ,  $df=2$ ,  $p<.001$ ). Dogs waited longer in the unwilling condition than in both unable conditions (see Table S2). Adding order to the full model did not increase the fit of the model ( $\chi^2=10.598$ ,  $df=5$ ,  $p=.060$ ).

Table S2. Results of the full cox model

| term                                  | $\beta$ | SE    | z    | p     |
|---------------------------------------|---------|-------|------|-------|
| condition unable-clumsy <sup>1</sup>  | 0.936   | 0.250 | 3.74 | <.001 |
| condition unable-blocked <sup>1</sup> | 1.481   | 0.253 | 5.85 | <.001 |

<sup>1</sup>condition was dummy coded with unwilling being the reference level

We found similar results fitting a conducting a non-parametric Friedman's ANOVA and fitting a Bayesian Generalized Linear Mixed Model. Friedman's ANOVA revealed a main effect on relative latencies for Condition ( $\chi^2=28.138$ ,  $df=2$ ,  $p<.001$ ). Post hoc tests with Bonferroni correction applied indicated that dogs waited significantly longer in the unwilling condition than in both unable conditions (clumsy: observed difference= 28.0,  $p=.015$ ; blocked: observed difference=51.5,  $p<.001$ ; critical difference: 24.178). We fitted a Bayesian Generalized Linear Mixed Model with beta error distribution and logit link and included the same effects model as in our main frequentist analysis. Again, we found that dogs waited longer in the unwilling condition than in the unable-clumsy condition ( $\beta=-0.49$ , 95% CI [-0.73, -0.26]) and in the unable-blocked condition ( $\beta=-0.85$ , 95% CI [-1.08, -0.61]).

We used the following software and packages for analyses<sup>8-21</sup> .:

- RStudio Version 1.1.463 and Version 1.3.1093 (for Bayesian modelling)

- brms (2.14.4), car (3.0-6), coxme (2.2-16), dplyr (1.0.5), glmmTMB (1.0.1), lme4 (1.1-21), multcomp (3.2-11), pgirmess (1.7.0), reshape2 (1.4.3), rstan (2.21.2), shinystan (2.5.0), survival (3.2-11), tidybayes (2.3.1), performance (0.7.1)
- boot.glmmTMB and glmmTMB\_stability function provided by Roger Mundry (2020)

Table S2. Overview of behavioural reactions in previous studies using the Unwilling vs Unable Paradigm<sup>1-7</sup>.

| Animal              | Measures                                                                                                                                  | Conditions                                                                       | Findings                                                                                                                      | Source                                         |
|---------------------|-------------------------------------------------------------------------------------------------------------------------------------------|----------------------------------------------------------------------------------|-------------------------------------------------------------------------------------------------------------------------------|------------------------------------------------|
| Chimpanzees         | Latency till leaving testing area<br>Knocking on glass<br>Poking finger in hole<br>Moving apparatus                                       | <i>3 Unwilling:<br/>Refuse, Eat, Tease</i>                                       | increased behavioural rate                                                                                                    | Call et al.,<br>2004                           |
|                     |                                                                                                                                           | <i>5 Unable:<br/>Clumsy, Blocked, Distracted,<br/>Search, Blind</i>              | Stayed longer in testing area                                                                                                 |                                                |
| Human Children      | Reaching behaviour<br>Spontaneous gestures<br>Banging on the table<br>Time spent looking at<br>experimenter<br>(Positive/negative affect) | <i>3 Unwilling:<br/>Refuse, Tease, Play, (Mock)</i>                              | Increased reaching for toy<br>Increased spontaneous gestures<br>Increased banging on the table<br>(Increased negative affect) | Behne et al.,<br>2005, (Marsh<br>et al., 2010) |
|                     |                                                                                                                                           | <i>6 Unable:<br/>Clumsy, Reach, Open, Talk,<br/>Telephone, Search, (Blocked)</i> | Longer time spent looking at experimenter<br>(Increased positive affect).                                                     |                                                |
| Capuchin<br>Monkeys | Latency till leaving testing area                                                                                                         | <i>1 Unwilling:<br/>Tease</i>                                                    |                                                                                                                               | Phillips et<br>al., 2009                       |
|                     |                                                                                                                                           | <i>2 Unable:<br/>Clumsy, Blocked</i>                                             | Stayed longer in testing area                                                                                                 |                                                |
| Grey Parrots        | Time facing away<br>Vocalisation<br>Wire mesh biting<br>Table scraping/ Knocking                                                          | <i>1 Unwilling:<br/>Tease</i>                                                    | Increased beak opening<br>Increased table scraping                                                                            | Peron et al.,<br>2010                          |
|                     |                                                                                                                                           | <i>2 Unable:<br/>Distracted, Blocked</i>                                         | Increased wire biting                                                                                                         |                                                |
| Tokean Macaques     | Latency till leaving testing area<br>Gazing alterations<br>Aggressive Behaviour<br>Begging<br>Spontaneous Gestures                        | <i>1 Unwilling:<br/>Tease</i>                                                    | Increased gaze alteration frequency<br>Increased aggressive behaviour                                                         | Canteloup &<br>Meunier<br>2017                 |
|                     |                                                                                                                                           | <i>2 Unable:<br/>Clumsy, Distracted</i>                                          | Increased begging<br>Increased spontaneous gestures                                                                           |                                                |
| Horses              | Percentage of time before<br>facing away<br>Percentage of time touching<br>barrier                                                        | <i>1 Unwilling:<br/>Tease</i>                                                    |                                                                                                                               | Trösch et al.<br>2020                          |
|                     |                                                                                                                                           | <i>2 Unable:<br/>Clumsy, Blocked</i>                                             | Higher Percentage of time before facing<br>away<br>Higher percentage of time touching barrier                                 |                                                |

Table S3: Ethogram of behaviours that have been coded in the time interval  $t_0 - t_1$  for each condition (adapted from Protopopova and colleagues<sup>22</sup>).

| Behaviour            | Definition                                                                           | Unwilling | Clumsy | Blocked | Total |
|----------------------|--------------------------------------------------------------------------------------|-----------|--------|---------|-------|
| <b>Position</b>      |                                                                                      |           |        |         |       |
| Standing             | Supported upright with all four legs (starting position)                             |           |        |         |       |
| Lying                | Lying down with limbs either tucked under or placed in front of body                 | 3         | 0      | 0       | 3     |
| Sitting              | Supported by two extended front legs and two flexed back legs                        | 8         | 3      | 4       | 15    |
| Beg position         | At least one front paw lifted of ground while the back legs remain flexed            | 2         | 3      | 4       | 9     |
| <b>Face</b>          |                                                                                      |           |        |         |       |
| Facing forward       | Head is oriented so that it is facing the experimenter (starting position)           |           |        |         |       |
| Facing away          | Head is oriented so that the experimenter only sees the profile of the dog           | 8         | 2      | 11      | 21    |
| <b>Locomotion</b>    |                                                                                      |           |        |         |       |
| Standing up          | Change of position from sitting or lying into standing                               | 7         | 1      | 2       | 9     |
| Moving away          | Dog moves away from the separation wall/experimenter                                 | 0         | 0      | 0       | 0     |
| Moving forward       | Dog moves around the separation wall in direction to the treat                       | 40        | 45     | 47      | 132   |
| <b>Vocalization</b>  |                                                                                      |           |        |         |       |
| Barking              | Vocalization of very short duration and low frequency                                | 2         | 0      | 1       | 3     |
| Growling             | Throaty, rumbling vocalization                                                       | 0         | 0      | 0       | 0     |
| <b>Maintenance</b>   |                                                                                      |           |        |         |       |
| Yawning              | Opens mouth widely and inhales                                                       | 0         | 0      | 0       | 0     |
| Panting              | Tongue exposed with audible and/or observable breathing                              | 9         | 9      | 10      | 28    |
| Scratching           | Paw makes repeated contact with body; head may be angled in direction of moving limb | 0         | 0      | 1       | 1     |
| <b>Tail position</b> |                                                                                      |           |        |         |       |
| Wagging tail         | Tail moves perpendicular to the dog's body                                           | 29        | 28     | 30      | 87    |
| Stop Wagging         | Ceasing of tail wagging at the start of/during the condition                         | 14        | 3      | 1       | 18    |

Table S4. List of the tested dogs with age, sex, and breed.

| Dog-ID | Age | Sex | Breed                      | Mix: Known Breeds                            |
|--------|-----|-----|----------------------------|----------------------------------------------|
| 203    | 6   | f   | Border Collie              |                                              |
| 106    | 10  | m   | Chihuahua                  |                                              |
| 177    | 3   | m   | Eurasian                   |                                              |
| 230    | 3   | m   | Fox Terrier                |                                              |
| 158    | 5   | f   | French Bulldog             |                                              |
| 220    | 1   | m   | French Bulldog             |                                              |
| 227    | 3   | f   | French Bulldog             |                                              |
| 228    | 7   | f   | Galgo Espanol              |                                              |
| 95     | 5   | m   | German Shepherd            |                                              |
| 213    | 2   | m   | German wire-haired Pointer |                                              |
| 20     | 9   | m   | Golden Retriever           |                                              |
| 33     | 10  | m   | Golden Retriever           |                                              |
| 159    | 3   | m   | Golden Retriever           |                                              |
| 193    | 4   | m   | Golden Retriever           |                                              |
| 202    | 2   | f   | Golden Retriever           |                                              |
| 224    | 3   | m   | Golden Retriever           |                                              |
| 197    | 8   | m   | Irish setter               |                                              |
| 180    | 4   | f   | Jack Russel Terrier        |                                              |
| 195    | 4   | m   | Labrador                   |                                              |
| 225    | 1   | f   | Malinois                   |                                              |
| 78     | 13  | f   | Mix (big)                  | English Pointer/ Podenco                     |
| 46     | 7   | m   | Mix (big)                  |                                              |
| 113    | 9   | f   | Mix (big)                  | Bernese Mountain Dog                         |
| 200    | 10  | f   | Mix (big)                  | Canadian Eskimo Dog                          |
| 205    | 5   | f   | Mix (big)                  | German Shepherd                              |
| 214    | 8   | m   | Mix (big)                  | Bernese Mountain Dog/ Old German Herding Dog |
| 226    | 3   | m   | Mix (big)                  | Boxer                                        |
| 111    | 8   | m   | Mix (midsize)              | Labrador                                     |
| 156    | 4   | f   | Mix (midsize)              | German Shepherd/Rottweiler                   |
| 188    | 4   | f   | Mix (midsize)              | Golden Retriever                             |
| 199    | 8   | m   | Mix (midsize)              | German Shepherd/Rottweiler                   |
| 215    | 1   | f   | Mix (midsize)              | Old German Herding Dog                       |
| 223    | 15  | f   | Mix (midsize)              | Border Collie                                |
| 234    | 4   | f   | Mix (midsize)              | Australian Shepherd/ Beagle                  |
| 98     | 9   | f   | Mix (small)                |                                              |
| 99     | 8   | f   | Mix (small)                |                                              |
| 100    | 8   | f   | Mix (small)                |                                              |
| 162    | 3   | m   | Mix (small)                | Bolonka Zwitna                               |
| 163    | 6   | m   | Mix (small)                | Bolonka Zwitna                               |
| 194    | 8   | m   | Mix (small)                | Beagle/ Jack Russel Terrier                  |
| 198    | 1   | m   | Mix (small)                |                                              |
| 170    | 3   | f   | Pug                        |                                              |
| 171    | 3   | m   | Pug                        |                                              |
| 83     | 6   | f   | Ratonero Bodeguero         |                                              |
|        |     |     | Andaluz                    |                                              |
| 30     | 3   | m   | Rottweiler                 |                                              |
| 79     | 6   | f   | Small Munsterlander        |                                              |
| 221    | 12  | f   | Small Munsterlander        |                                              |
| 4      | 12  | f   | Vizsla                     |                                              |
| 231    | 1   | f   | Vizsla                     |                                              |
| 229    | 1   | f   | White Swiss Shepherd       |                                              |
| 232    | 4   | f   | Wire-haired Dachshund      |                                              |

Table S5: Orders of conditions W = Unwilling, B= Unable-blocked, C=Unable-clumsy and the number of dogs that have been tested in this order.

| Order | N |
|-------|---|
| WCB   | 9 |
| WBC   | 8 |
| BWC   | 9 |
| BCW   | 8 |
| CBW   | 9 |
| CWB   | 8 |

## References

1. Trösch, M., Bertin, E., Calandreau, L., Nowak, R. & Lansade, L. Unwilling or willing but unable: can horses interpret human actions as goal directed? *Anim. Cogn.* **23**, 1035–1040 (2020).
2. Phillips, W., Barnes, J. L., Mahajan, N., Yamaguchi, M. & Santos, L. R. ‘Unwilling’ versus ‘unable’: capuchin monkeys’ (*Cebus apella*) understanding of human intentional action: Unwilling vs. unable in capuchin monkeys. *Dev. Sci.* **12**, 938–945 (2009).
3. Péron, F., Rat-Fischer, L., Nagle, L. & Bovet, D. ‘Unwilling’ versus ‘unable’: Do grey parrots understand human intentional actions? *Interact. Stud.* **11**, 428–441 (2010).
4. Marsh, H. L., Stavropoulos, J., Nienhuis, T. & Legerstee, M. Six- and 9-Month-Old infants discriminate between goals despite similar action patterns. *Infancy* **15**, 94–106 (2010).
5. Canteloup, C. & Meunier, H. ‘Unwilling’ versus ‘unable’: Tonkean macaques’ understanding of human goal-directed actions. *PeerJ* **5**, e3227 (2017).
6. Call, J., Hare, B., Carpenter, M. & Tomasello, M. ‘Unwilling’ versus ‘unable’: chimpanzees’ understanding of human intentional action. *Dev. Sci.* **7**, 488–498 (2004).
7. Behne, T., Carpenter, M., Call, J. & Tomasello, M. Unwilling versus unable: infants’ understanding of intentional action. *Dev. Psychol.* **41**, 328–337 (2005).
8. Lüdecke, D., Ben Shachar, M. S., Patil, I., Waggoner, P. & Makowski, D. *Assessment, testing and comparison of statistical models using R. R package version 0.7.1.* (2021).
9. Kay, M. *tidybayes: tidy data and geoms for bayesian models. R package version 2.3.1.* (2020).
10. Therneau, T. M. *A package for survival analysis in R. R package version 3.2-11.*



(2021).

11. Wickham, H., Francois, R., Henry, L. & Müller, K. *dplyr: a grammar of data manipulation. R package version 1.0.5.* (2021).
12. Wickham, H. *Reshaping data with the reshape package. R package version 1.4.3.* (2007).
13. Therneau, T. M. *coxme: Mixed effects cox models. R package version 2.2-16.* (2020).
14. Stan Development Team. *RStan: the R interface to stan. R package version 2.21.2.* (2020).
15. Hothorn, T., Bretz, F. & Westfall, P. *Simultaneous inference in general parametric models. R package version 3.2-11.* (2008).
16. Giraudoux, P. *pgirmess: Spatial analysis and data mining for field ecologists. R package version 1.7.0.* (2021).
17. Gabry, J. *shinystan: Interactive visual and numerical diagnostics and posterior analysis for bayesian models. R package version 2.5.0.* (2018).
18. Fox, J. & Weisberg, S. *An {R} companion to applied regression. R package version 3.0-6.* (2019).
19. Bürkner, P. C. *Advanced bayesian multilevel modeling with the R package brms. R package version 2.14.4.* (2018).
20. Brooks, M. E. *et al. glmmTMB balances speed and flexibility among packages for zero-inflated generalized linear mixed modeling. R package version 1.0.1.* (2017).
21. Bates, D., Maechler, M., Bolker, B. & Walker, S. *Fitting linear mixed-effects models using lme4. R package version 1.1-21.* (2015).
22. Protopopova, A., Mehrkam, L. R., Boggess, M. M. & Wynne, C. D. L. In-kennel behavior predicts length of stay in shelter dogs. *PloS One* **9**, e114319 (2014).
